# Supplementary material for: The Influence of Planting Periods on Herbivore and Natural Enemy Abundance on Yellow Sticky Traps in Bt Maize Fields
Source: MDPI journal article supplement (doi:10.3390/insects13040388), 2022-04-14
Supplement: s1 [file s1]

Supplementary material: The influence of planting periods on herbivore and natural enemy abundance on yellow sticky traps in Bt maize fields. Clemente-Orta et. al

**S1. Data**

| año  | Site          | Pheno  | Sowing | F. occiden | Other thrips | Zyg        | Laodelphax | Empo       | Aphid      | Orius      | Steth      | Crisopa    | Aeolothrips | Sirf       | coc        |
|------|---------------|--------|--------|------------|--------------|------------|------------|------------|------------|------------|------------|------------|-------------|------------|------------|
| 2017 | Alcarras      | V1-V7  | Late   | 43,3333333 | 52,6666667   | 182        | 3,33333333 | 2,66666667 | 196,333333 | 0          | 1          | 0          | 9,33333333  | 0,33333333 | 1          |
| 2017 | Bassanova1    | V1-V7  | Late   | 10,6666667 | 218          | 31         | 0,66666667 | 6,33333333 | 144,666667 | 0,66666667 | 2,33333333 | 0,66666667 | 4           | 1,33333333 | 2          |
| 2017 | Ramon Vidal   | V1-V7  | Early  | 7,33333333 | 445          | 157,333333 | 6,33333333 | 39,6666667 | 79         | 0,33333333 | 0,33333333 | 0          | 3,33333333  | 0,66666667 | 0          |
| 2017 | Alcarras-Gim1 | V1-V7  | Late   | 231,666667 | 101,666667   | 4,66666667 | 2,66666667 | 6,33333333 | 74,6666667 | 0          | 1,66666667 | 0          | 27,3333333  | 4          | 1,33333333 |
| 2017 | Manoleta      | V1-V7  | Late   | 317,666667 | 169          | 165        | 25,3333333 | 7          | 81,6666667 | 1,66666667 | 1          | 0          | 30,6666667  | 1,66666667 | 2,33333333 |
| 2017 | Circuito      | V1-V7  | Early  | 27,3333333 | 107          | 16,3333333 | 0,33333333 | 2,66666667 | 61,6666667 | 0          | 2          | 0,66666667 | 7,33333333  | 0,66666667 | 0          |
| 2017 | Miguel Velo1  | V1-V7  | Early  | 45         | 122,666667   | 5,33333333 | 0          | 27,6666667 | 39,6666667 | 0,33333333 | 1,5        | 2          | 33,6666667  | 0,33333333 | 1,33333333 |
| 2017 | Bassanova2    | V1-V7  | Early  | 9          | 103,666667   | 16         | 0          | 0,66666667 | 59         | 0,33333333 | 0,33333333 | 0          | 2,66666667  | 0,33333333 | 0,33333333 |
| 2017 | Altorrico2    | V1-V7  | Late   | 114        | 159,333333   | 12,6666667 | 3,66666667 | 4,66666667 | 18,6666667 | 1,66666667 | 1,33333333 | 3          | 18,6666667  | 14,3333333 | 2,33333333 |
| 2017 | Canal         | V1-V7  | Early  | 11,3333333 | 43,3333333   | 436,333333 | 1          | 3,33333333 | 39,3333333 | 0          | 0,33333333 | 0,33333333 | 6,66666667  | 0          | 0          |
| 2017 | Jardiland     | V1-V7  | Late   | 117        | 30           | 26,6666667 | 1          | 2,66666667 | 193        | 1,66666667 | 0          | 0          | 21          | 1          | 0,33333333 |
| 2017 | Diarte        | V1-V7  | Early  | 31,6666667 | 125          | 28,6666667 | 0          | 9,66666667 | 89,6666667 | 0          | 0,33333333 | 1,33333333 | 15,6666667  | 0          | 1          |
| 2017 | Pantano       | V1-V7  | Late   | 25,3333333 | 128,666667   | 26,6666667 | 0,33333333 | 20         | 61         | 0          | 1,33333333 | 1          | 43,3333333  | 0          | 1,33333333 |
| 2017 | Altorrico1    | V1-V7  | Early  | 77,6666667 | 132,666667   | 8          | 1,66666667 | 50,6666667 | 103,666667 | 0,33333333 | 0          | 0          | 2           | 2          | 0          |
| 2017 | Josep Tomás   | V1-V7  | Late   | 187,333333 | 451          | 2,66666667 | 0          | 2          | 99         | 1          | 2          | 0          | 3,66666667  | 0          | 0          |
| 2017 | Gimenells     | V1-V7  | Late   | 7,66666667 | 58           | 9,33333333 | 0          | 3,66666667 | 77,3333333 | 0          | 0,66666667 | 1,33333333 | 2,33333333  | 1,33333333 | 1          |
| 2017 | Alcarras-Gim2 | V1-V7  | Early  | 527        | 125,666667   | 92,6666667 | 16         | 3,33333333 | 51         | 2,66666667 | 0          | 3,33333333 | 29,3333333  | 17,3333333 | 1,33333333 |
| 2017 | Carrasumada1  | V1-V7  | Early  | 386,333333 | 38           | 52,6666667 | 29         | 12,6666667 | 29         | 20,6666667 | 0          | 1,33333333 | 44,6666667  | 0          | 0,66666667 |
| 2017 | Aeropuerto    | V1-V7  | Late   | 429        | 156          | 22,3333333 | 3,66666667 | 4,66666667 | 77,6666667 | 2,33333333 | 0,33333333 | 6,66666667 | 62,6666667  | 13         | 5,33333333 |
| 2017 | Sucs          | V1-V7  | Early  | 8,33333333 | 295          | 6,33333333 | 1          | 1,66666667 | 71,3333333 | 0,33333333 | 0,33333333 | 0          | 16,3333333  | 0          | 1,33333333 |
| 2017 | Mirador       | V1-V7  | Early  | 75,3333333 | 250          | 20         | 0          | 46,3333333 | 110        | 0          | 0,66666667 | 2,66666667 | 16          | 0,66666667 | 1          |
| 2017 | Vencillo      | V1-V7  | Early  | 145,666667 | 227,333333   | 6,33333333 | 0,33333333 | 48,6666667 | 66,6666667 | 0          | 8,33333333 | 3          | 10,6666667  | 1,66666667 | 0,66666667 |
| 2017 | Nyaco         | V1-V7  | Early  | 40         | 145          | 22,6666667 | 0,33333333 | 8,66666667 | 216        | 0,33333333 | 1,66666667 | 0,66666667 | 41          | 4          | 0          |
| 2017 | Pantano       | VT-R1  | Late   | 218        | 11           | 113,666667 | 45         | 4,33333333 | 5,66666667 | 38,6666667 | 0,33333333 | 5          | 19          | 0          | 7          |
| 2017 | Vencillo      | VT-R1  | Early  | 315,333333 | 45,6666667   | 122        | 7,66666667 | 4          | 2,66666667 | 25         | 0,33333333 | 6,33333333 | 28,3333333  | 0          | 0,33333333 |
| 2017 | Mirador       | V8-V16 | Early  | 353,333333 | 16           | 48,3333333 | 14         | 2,33333333 | 5          | 48,6666667 | 0          | 0,33333333 | 3           | 0          | 0          |

Supplementary material: The influence of planting periods on herbivore and natural enemy abundance on yellow sticky traps in Bt maize fields. Clemente-Orta et. al

|      |               |        |       |            |            |            |            |            |            |            |            |            |            |            |            |
|------|---------------|--------|-------|------------|------------|------------|------------|------------|------------|------------|------------|------------|------------|------------|------------|
| 2017 | Canal         | VT-R1  | Early | 79,6666667 | 3,3333333  | 182,666667 | 18,3333333 | 0,66666667 | 0,66666667 | 17,6666667 | 0          | 0,33333333 | 1,33333333 | 0          | 6          |
| 2017 | Josep Tomás   | V8-V16 | Late  | 148,666667 | 44         | 15         | 11,3333333 | 8,66666667 | 1          | 3,33333333 | 0          | 5,66666667 | 38         | 0          | 3          |
| 2017 | Bassanova2    | VT-R1  | Early | 87,6666667 | 4,33333333 | 170,666667 | 7,66666667 | 3,33333333 | 2          | 17,3333333 | 0          | 1          | 17         | 0,33333333 | 0,33333333 |
| 2017 | Diarte        | VT-R1  | Early | 125,333333 | 0          | 20,6666667 | 4          | 0,66666667 | 0,66666667 | 1          | 0          | 0          | 2          | 0          | 4,33333333 |
| 2017 | Miguel Velo1  | VT-R1  | Early | 265,666667 | 4,33333333 | 106,333333 | 13,6666667 | 20,6666667 | 2,66666667 | 41,6666667 | 1,33333333 | 2          | 116,666667 | 0          | 3          |
| 2017 | Ramon Vidal   | VT-R1  | Early | 54         | 41,6666667 | 399,333333 | 21,3333333 | 1          | 4,66666667 | 40         | 0,66666667 | 1,33333333 | 0,33333333 | 0          | 0,33333333 |
| 2017 | Bassanova1    | V8-V16 | Late  | 53,3333333 | 73,3333333 | 72         | 30,3333333 | 0,33333333 | 3          | 8,33333333 | 0,66666667 | 0          | 0,66666667 | 0          | 1,33333333 |
| 2017 | Nyaco         | VT-R1  | Early | 565        | 62,6666667 | 225,333333 | 11,6666667 | 25,6666667 | 2,66666667 | 17,3333333 | 0          | 1,66666667 | 22,3333333 | 0,66666667 | 0          |
| 2017 | Gimenells     | V8-V16 | Late  | 187,333333 | 98,6666667 | 11         | 1,66666667 | 29,3333333 | 2,33333333 | 10,3333333 | 0          | 3,66666667 | 16,3333333 | 0          | 1          |
| 2017 | Altorrico1    | V8-V16 | Early | 40         | 38         | 63         | 17,3333333 | 1,66666667 | 1,66666667 | 18         | 0          | 0          | 6,33333333 | 0          | 2,66666667 |
| 2017 | Carrasumada1  | VT-R1  | Early | 59         | 5,33333333 | 1306,66667 | 11         | 38,6666667 | 0,33333333 | 36         | 0,33333333 | 0,66666667 | 7,33333333 | 0          | 0          |
| 2017 | Alcarras      | V8-V16 | Late  | 191        | 40,3333333 | 687,333333 | 23         | 24,6666667 | 1,66666667 | 37,6666667 | 0,66666667 | 0          | 19,6666667 | 0          | 2,33333333 |
| 2017 | Manoleta      | V8-V16 | Late  | 138        | 80,3333333 | 41         | 34         | 12,3333333 | 14,3333333 | 15,3333333 | 0,66666667 | 0          | 29         | 0          | 0,33333333 |
| 2017 | Circuito      | V8-V16 | Early | 38,3333333 | 34         | 110        | 82,3333333 | 8,33333333 | 10         | 11,6666667 | 0          | 0,33333333 | 6,66666667 | 0          | 0,33333333 |
| 2017 | Sucs          | VT-R1  | Early | 300,666667 | 15,3333333 | 29         | 9,33333333 | 2,33333333 | 3,66666667 | 5,66666667 | 0          | 10,3333333 | 16         | 0          | 5          |
| 2017 | Alcarras-Gim2 | VT-R1  | Early | 60         | 18,3333333 | 65         | 43         | 47,6666667 | 6,33333333 | 10,3333333 | 7          | 2          | 0          | 0          | 0,66666667 |
| 2017 | Altorrico2    | R2-R3  | Late  | 115,666667 | 32,6666667 | 90         | 59,3333333 | 18,3333333 | 2,66666667 | 4,66666667 | 1,33333333 | 0          | 9,66666667 | 0          | 4,66666667 |
| 2017 | Jardiland     | VT-R1  | Late  | 42,6666667 | 15,6666667 | 339,666667 | 46,3333333 | 20,3333333 | 4,66666667 | 17,3333333 | 3          | 1,33333333 | 6,33333333 | 0          | 0          |
| 2017 | Aeropuerto    | VT-R1  | Late  | 179,666667 | 0          | 285,666667 | 9          | 2,66666667 | 0          | 11         | 13         | 0          | 25,3333333 | 0,33333333 | 2,66666667 |
| 2017 | Alcarras-Gim1 | R2-R3  | Late  | 85,6666667 | 0,66666667 | 96,3333333 | 27,6666667 | 8,66666667 | 0,66666667 | 4          | 14,3333333 | 0,66666667 | 2,66666667 | 0          | 3          |
| 2017 | Gimenells     | R4-R5  | Late  | 46         | 1,33333333 | 105,666667 | 3          | 5,66666667 | 0          | 7,66666667 | 20         | 9          | 3,66666667 | 1          | 0          |
| 2017 | Circuito      | R4-R5  | Early | 31,3333333 | 2,66666667 | 4,33333333 | 4,33333333 | 3,33333333 | 0,33333333 | 21         | 41,3333333 | 4          | 0,33333333 | 0          | 2,33333333 |
| 2017 | Bassanova2    | R4-R5  | Early | 41,3333333 | 10,3333333 | 39,6666667 | 1,33333333 | 4          | 1          | 9,66666667 | 19,3333333 | 3          | 0,66666667 | 0          | 0,66666667 |
| 2017 | Bassanova1    | R2-R3  | Late  | 29,6666667 | 3          | 33,3333333 | 5,66666667 | 3,66666667 | 0,33333333 | 17,3333333 | 15         | 12,6666667 | 0,66666667 | 0          | 2,33333333 |
| 2017 | Josep Tomás   | R2-R3  | Late  | 107,333333 | 1,66666667 | 169,333333 | 1,33333333 | 14,6666667 | 0          | 15,6666667 | 22         | 3,33333333 | 18,6666667 | 0          | 1,33333333 |
| 2017 | Alcarras      | R4-R5  | Late  | 6,66666667 | 2,33333333 | 71,3333333 | 8,66666667 | 7,33333333 | 0,66666667 | 10,3333333 | 32,6666667 | 2,66666667 | 0          | 0          | 0,66666667 |
| 2017 | Carrasumada1  | R4-R5  | Early | 56         | 29,3333333 | 45,3333333 | 7,66666667 | 9          | 1,66666667 | 19,3333333 | 29,6666667 | 6,33333333 | 0,66666667 | 0          | 0,33333333 |
| 2017 | Diarte        | R4-R5  | Early | 22,6666667 | 2          | 16         | 5,66666667 | 0          | 0,33333333 | 4,66666667 | 5          | 0,66666667 | 0          | 0          | 0,33333333 |

Supplementary material: The influence of planting periods on herbivore and natural enemy abundance on yellow sticky traps in Bt maize fields. Clemente-Orta et. al

|      |               |       |       |            |            |            |            |            |            |            |            |            |            |            |            |
|------|---------------|-------|-------|------------|------------|------------|------------|------------|------------|------------|------------|------------|------------|------------|------------|
| 2017 | Altorrico1    | R4-R5 | Early | 53,6666667 | 2          | 6,33333333 | 4,66666667 | 3          | 1,33333333 | 11,6666667 | 8,33333333 | 0,33333333 | 1          | 0          | 8,66666667 |
| 2017 | Manoleta      | R2-R3 | Late  | 172        | 3,66666667 | 16,6666667 | 18,6666667 | 6,33333333 | 3,33333333 | 9          | 5,33333333 | 2,33333333 | 1,33333333 | 0,33333333 | 11,6666667 |
| 2017 | Vencillo      | R4-R5 | Early | 175,666667 | 11,6666667 | 9,33333333 | 1          | 1,66666667 | 2          | 2          | 74         | 4          | 0,33333333 | 0          | 1,33333333 |
| 2017 | Miguel Velo1  | R2-R3 | Early | 62,6666667 | 9,66666667 | 18,6666667 | 5,66666667 | 45,6666667 | 1,66666667 | 16         | 64,3333333 | 7,66666667 | 0,33333333 | 0,33333333 | 5,66666667 |
| 2017 | Mirador       | R4-R5 | Early | 95,3333333 | 10,3333333 | 9,33333333 | 5,33333333 | 4          | 0,33333333 | 10,3333333 | 16,6666667 | 12,3333333 | 0,33333333 | 0,33333333 | 2          |
| 2017 | Canal         | R2-R3 | Early | 12,6666667 | 1          | 7,33333333 | 2,66666667 | 2,66666667 | 0          | 10,3333333 | 3,66666667 | 0          | 0          | 0          | 2,33333333 |
| 2017 | Ramon Vidal   | R4-R5 | Early | 168        | 7,33333333 | 18,6666667 | 2,66666667 | 2,33333333 | 0,66666667 | 7,66666667 | 102        | 1          | 0,66666667 | 0,33333333 | 6          |
| 2017 | Nyaco         | R4-R5 | Early | 38         | 4          | 16,3333333 | 1          | 2,33333333 | 0,33333333 | 12,3333333 | 50,6666667 | 2          | 0          | 0,33333333 | 0          |
| 2017 | Sucs          | R4-R5 | Early | 206,333333 | 5          | 8,66666667 | 5,33333333 | 0,66666667 | 0,33333333 | 9,33333333 | 32,3333333 | 4,66666667 | 3          | 0          | 7,33333333 |
| 2017 | Alcarras-Gim1 | R4-R5 | Late  | 16         | 0          | 2          | 4,33333333 | 5,66666667 | 0,66666667 | 8          | 0          | 0          | 0          | 0          | 0          |
| 2017 | Alcarras-Gim2 | R4-R5 | Early | 13         | 3,33333333 | 1,33333333 | 2          | 15,6666667 | 8,33333333 | 8,66666667 | 0,33333333 | 0          | 0          | 0,33333333 | 0          |
| 2017 | Gimenells     | R2-R3 | Late  | 4,66666667 | 0          | 6          | 0          | 3,33333333 | 0,66666667 | 11,3333333 | 1          | 1          | 0          | 0          | 0          |
| 2017 | Aeropuerto    | R2-R3 | Late  | 1          | 0,33333333 | 0          | 0          | 4          | 0,66666667 | 4,66666667 | 0,33333333 | 0          | 0          | 0          | 0          |
| 2017 | Altorrico2    | VT-R1 | Late  | 18,3333333 | 7,33333333 | 2          | 1,33333333 | 8          | 2,33333333 | 6,33333333 | 1,66666667 | 0          | 0          | 0          | 0          |
| 2017 | Jardiland     | VT-R1 | Late  | 17,6666667 | 3,66666667 | 1,33333333 | 3          | 1,66666667 | 1,66666667 | 14         | 1,33333333 | 0          | 0,33333333 | 0          | 0          |
| 2017 | Gimenells     | R4-R5 | Late  | 2,33333333 | 0,33333333 | 26,6666667 | 1          | 2,66666667 | 1          | 3          | 19         | 9          | 0          | 0          | 0          |
| 2017 | Circuito      | R4-R5 | Early | 10,3333333 | 0          | 6,33333333 | 0,66666667 | 1,33333333 | 1          | 4,33333333 | 2,66666667 | 0          | 0          | 0          | 0,66666667 |
| 2017 | Miguel Velo1  | R4-R5 | Early | 27,3333333 | 1          | 1,66666667 | 1,66666667 | 36         | 3          | 20,3333333 | 4,66666667 | 5          | 0          | 0          | 0          |
| 2017 | Manoleta      | R6    | Late  | 33,6666667 | 0          | 1,66666667 | 11,6666667 | 5,66666667 | 5,33333333 | 10,6666667 | 1,33333333 | 2          | 0          | 0          | 0,33333333 |
| 2017 | Carrasumada1  | R6    | Early | 68,3333333 | 1,66666667 | 2,33333333 | 2          | 8          | 3          | 4,66666667 | 0,66666667 | 5,33333333 | 0,33333333 | 0,33333333 | 0          |
| 2017 | Ramon Vidal   | R6    | Early | 57,3333333 | 1,66666667 | 1,66666667 | 0          | 3          | 2          | 6,33333333 | 8,66666667 | 1          | 0,33333333 | 0          | 0          |
| 2017 | Altorrico1    | R6    | Early | 12,6666667 | 1          | 0,66666667 | 1,66666667 | 1,33333333 | 1          | 10,3333333 | 8,66666667 | 0,33333333 | 0          | 0,33333333 | 4          |
| 2017 | Altorrico2    | R4-R5 | Late  | 10,3333333 | 2          | 0,33333333 | 18,3333333 | 3          | 0,66666667 | 10,6666667 | 6,66666667 | 0,33333333 | 1          | 0          | 0,33333333 |
| 2017 | Vencillo      | R6    | Early | 38,6666667 | 1,33333333 | 0,33333333 | 0,33333333 | 3          | 1,33333333 | 0          | 8,33333333 | 0          | 1          | 0,33333333 | 0          |
| 2017 | Jardiland     | R4-R5 | Late  | 41         | 3          | 9,33333333 | 20,6666667 | 3,66666667 | 1          | 5          | 1,33333333 | 1          | 2,33333333 | 0          | 0          |
| 2017 | Pantano       | R6    | Late  | 123,333333 | 17         | 7          | 1          | 43,3333333 | 6,66666667 | 4          | 13         | 0          | 3          | 0          | 0,33333333 |
| 2017 | Alcarras-Gim2 | R4-R5 | Early | 38,6666667 | 4,66666667 | 2          | 21         | 44,6666667 | 6,33333333 | 18,6666667 | 3          | 0,66666667 | 1,66666667 | 0,66666667 | 0          |
| 2017 | Alcarras-Gim1 | R4-R5 | Late  | 11,3333333 | 0,33333333 | 5          | 15,3333333 | 12,6666667 | 0,33333333 | 4          | 1          | 0          | 0          | 0          | 0          |

Supplementary material: The influence of planting periods on herbivore and natural enemy abundance on yellow sticky traps in Bt maize fields. Clemente-Orta et. al

|      |              |        |       |            |            |            |            |            |            |            |            |            |            |            |            |
|------|--------------|--------|-------|------------|------------|------------|------------|------------|------------|------------|------------|------------|------------|------------|------------|
| 2017 | Bassanova1   | R6     | Late  | 20,6666667 | 0,66666667 | 5,66666667 | 0          | 2,66666667 | 3          | 8,33333333 | 44,6666667 | 2          | 0,33333333 | 0,33333333 | 0,66666667 |
| 2017 | Canal        | R6     | Early | 8,33333333 | 0,33333333 | 8,66666667 | 0,66666667 | 18         | 3,33333333 | 1          | 3          | 0          | 0,33333333 | 0          | 0,66666667 |
| 2017 | Josep Tomás  | R6     | Late  | 11,3333333 | 2          | 23         | 0,33333333 | 0,33333333 | 1,66666667 | 14,3333333 | 93,3333333 | 0          | 0,33333333 | 0          | 0,33333333 |
| 2017 | Nyaco        | R6     | Early | 29,3333333 | 6,66666667 | 4          | 0          | 2,33333333 | 8,66666667 | 2,33333333 | 19,3333333 | 0          | 1          | 0          | 0          |
| 2017 | Mirador      | R4-R5  | Early | 74,6666667 | 14         | 6,66666667 | 0,33333333 | 13,3333333 | 3,66666667 | 3,66666667 | 19,3333333 | 0,66666667 | 2,33333333 | 0,33333333 | 0,33333333 |
| 2017 | Alcarras     | R6     | Late  | 3          | 0,66666667 | 1,33333333 | 4          | 2          | 0          | 2,33333333 | 1,66666667 | 0,66666667 | 0          | 0          | 0          |
| 2017 | Sucs         | R6     | Early | 4,66666667 | 0,33333333 | 2,33333333 | 1,66666667 | 2,33333333 | 0,66666667 | 3,33333333 | 1,66666667 | 1          | 0          | 0          | 0          |
| 2017 | Diarte       | R6     | Early | 4          | 0,66666667 | 1,66666667 | 2,33333333 | 1,66666667 | 0,33333333 | 3,33333333 | 1          | 1,33333333 | 0          | 0          | 0          |
| 2017 | Aeropuerto   | R4-R5  | Late  | 2,66666667 | 0          | 2,33333333 | 0          | 2,33333333 | 0          | 9,66666667 | 9          | 0          | 0          | 0          | 0          |
| 2016 | Circuito     | V8-V16 | Late  | 142,333333 | 28         | 49,3333333 | 12,6666667 | 1,66666667 | 22,3333333 | 0,66666667 | 0          | 0,33333333 | 9,33333333 | 0          | 0,33333333 |
| 2016 | Miguel Velo1 | V8-V16 | Early | 377,666667 | 34,3333333 | 59,6666667 | 11         | 2          | 29         | 7          | 1          | 0          | 15,6666667 | 0          | 4          |
| 2016 | Gimenells    | V8-V16 | Early | 85,3333333 | 24,6666667 | 43,3333333 | 12         | 3          | 9,66666667 | 14         | 0,33333333 | 0          | 3,33333333 | 0          | 1          |
| 2016 | Vencillo     | V1-V7  | Early | 2280,33333 | 341        | 81,6666667 | 26,3333333 | 6          | 29         | 36         | 0          | 0          | 52         | 2          | 9,66666667 |
| 2016 | Aurora       | V8-V16 | Early | 583,666667 | 137,666667 | 72,6666667 | 5          | 83,3333333 | 20,3333333 | 9          | 0          | 0          | 59,6666667 | 0          | 0,66666667 |
| 2016 | Sucs         | V8-V16 | Early | 229        | 115,333333 | 59,3333333 | 18,6666667 | 1,33333333 | 4,33333333 | 1,33333333 | 0          | 0          | 19         | 2          | 2,66666667 |
| 2016 | Nyaco        | V8-V16 | Early | 722,333333 | 338        | 44         | 23         | 2,66666667 | 62         | 1,66666667 | 0          | 0          | 11,3333333 | 13,6666667 | 4          |
| 2016 | Pantano      | V8-V16 | Late  | 236,333333 | 53,6666667 | 9          | 11         | 1,33333333 | 42,3333333 | 0,66666667 | 0,66666667 | 0          | 36,6666667 | 0,33333333 | 2          |
| 2016 | Mirador      | V8-V16 | Early | 1552       | 300        | 287,333333 | 25         | 12,6666667 | 68,3333333 | 38         | 1          | 0,66666667 | 15,3333333 | 2,33333333 | 2,66666667 |
| 2016 | Diarte       | V8-V16 | Early | 578,666667 | 62,6666667 | 34,3333333 | 8,66666667 | 5          | 9,33333333 | 8          | 0          | 0          | 2,66666667 | 0,33333333 | 0          |
| 2016 | Ramon Vidal  | V8-V16 | Early | 1021,66667 | 87,6666667 | 169,666667 | 4,33333333 | 8,66666667 | 13,3333333 | 19,3333333 | 1          | 0,33333333 | 328,666667 | 3,33333333 | 2          |
| 2016 | Canal        | V1-V7  | Early | 144,666667 | 37         | 241,666667 | 19,3333333 | 5          | 77         | 4,33333333 | 0          | 1,66666667 | 2          | 1,66666667 | 0,33333333 |
| 2016 | Manoleta     | V8-V16 | Early | 131,666667 | 20,6666667 | 53         | 24         | 3,66666667 | 5          | 2          | 0          | 0          | 17         | 0          | 1,66666667 |
| 2016 | Jardiland    | V1-V7  | Late  | 413,333333 | 45         | 224,666667 | 13,3333333 | 6,33333333 | 147,666667 | 21,6666667 | 0          | 0          | 46,6666667 | 0          | 2,66666667 |
| 2016 | Altorricon2  | V1-V7  | Late  | 784,333333 | 122,666667 | 74         | 28,6666667 | 3,33333333 | 61         | 10,6666667 | 0          | 0,33333333 | 45,6666667 | 3,33333333 | 8          |
| 2016 | Miguel Velo2 | V8-V16 | Early | 88,3333333 | 70,3333333 | 291,666667 | 17,3333333 | 5          | 58,3333333 | 8          | 0,66666667 | 0,33333333 | 9,66666667 | 2          | 2          |
| 2016 | Miguel Velo2 | VT-R1  | Early | 140,333333 | 23,6666667 | 1441,33333 | 1,33333333 | 3          | 15,3333333 | 13,6666667 | 1,33333333 | 1          | 4,33333333 | 0          | 0,33333333 |
| 2016 | Alcarras     | V8-V16 | Late  | 502,666667 | 73,6666667 | 244,333333 | 38,6666667 | 38,6666667 | 2,33333333 | 23,3333333 | 0,66666667 | 1          | 4,66666667 | 0          | 2,66666667 |
| 2016 | Manoleta     | VT-R1  | Early | 114,666667 | 8,66666667 | 444,666667 | 6,33333333 | 3,66666667 | 0,66666667 | 8,66666667 | 4          | 0,33333333 | 67,3333333 | 0          | 6          |

Supplementary material: The influence of planting periods on herbivore and natural enemy abundance on yellow sticky traps in Bt maize fields. Clemente-Orta et. al

|      |               |        |       |             |             |             |             |             |             |             |             |             |             |             |             |
|------|---------------|--------|-------|-------------|-------------|-------------|-------------|-------------|-------------|-------------|-------------|-------------|-------------|-------------|-------------|
| 2016 | Alcarras-Gim2 | V8-V16 | Early | 1925        | 72,6666667  | 165,3333333 | 12,33333333 | 14,6666667  | 15,33333333 | 23,6666667  | 0,333333333 | 6           | 11,6666667  | 2           | 16          |
| 2016 | Nyaco         | VT-R1  | Early | 831,666667  | 34          | 172,666667  | 92          | 2           | 9,333333333 | 37,6666667  | 0,66666667  | 0,66666667  | 2,333333333 | 0           | 2,333333333 |
| 2016 | Alcarras-Gim1 | V8-V16 | Late  | 3390        | 33          | 254         | 8,333333333 | 23          | 8,333333333 | 13,6666667  | 0           | 0,66666667  | 39          | 0,333333333 | 0,333333333 |
| 2016 | Altorrico1    | V8-V16 | Late  | 4225,66667  | 39,6666667  | 111,3333333 | 4,66666667  | 21          | 18,33333333 | 9,333333333 | 0,66666667  | 1,66666667  | 30          | 0,333333333 | 0           |
| 2016 | Josep Tomás   | V8-V16 | Late  | 3575        | 77,33333333 | 306,666667  | 3,66666667  | 70,33333333 | 6,66666667  | 36,6666667  | 1,66666667  | 0,66666667  | 169,3333333 | 0,333333333 | 1,66666667  |
| 2016 | Aeropuerto    | V8-V16 | Late  | 6946,33333  | 44,6666667  | 196,666667  | 5,333333333 | 56,33333333 | 7           | 109,3333333 | 1           | 4,333333333 | 61,33333333 | 0,66666667  | 6,333333333 |
| 2016 | Mirador       | VT-R1  | Early | 322,666667  | 3           | 127,3333333 | 8,66666667  | 0,66666667  | 4,66666667  | 33          | 2,333333333 | 1,333333333 | 0,333333333 | 0           | 0,333333333 |
| 2016 | Circuito      | VT-R1  | Late  | 216         | 6           | 539,666667  | 6           | 8,66666667  | 0           | 12          | 1           | 0,66666667  | 63          | 0           | 1,333333333 |
| 2016 | Sucs          | R2-R3  | Early | 88          | 3           | 92          | 0,333333333 | 2,66666667  | 0,333333333 | 1,333333333 | 2,66666667  | 0,333333333 | 7           | 0,66666667  | 4,333333333 |
| 2016 | Pantano       | VT-R1  | Late  | 204,666667  | 12,6666667  | 276         | 8,333333333 | 0,66666667  | 3,333333333 | 12,6666667  | 0,333333333 | 1,333333333 | 4           | 1,333333333 | 23,33333333 |
| 2016 | Diarte        | R2-R3  | Early | 90,6666667  | 0           | 92,33333333 | 2           | 2,333333333 | 1,333333333 | 2,333333333 | 1           | 0,66666667  | 1,333333333 | 0           | 6           |
| 2016 | Aurora        | VT-R1  | Early | 145,666667  | 7           | 719,3333333 | 5,333333333 | 9,66666667  | 3,66666667  | 45,6666667  | 23,6666667  | 13          | 9,66666667  | 0           | 0,333333333 |
| 2016 | Jardiland     | V8-V16 | Late  | 415,3333333 | 56          | 301,3333333 | 23,6666667  | 3           | 4,66666667  | 23,6666667  | 0,333333333 | 0           | 6,333333333 | 0           | 0,66666667  |
| 2016 | Vencillo      | VT-R1  | Early | 1715,33333  | 106,666667  | 155,666667  | 5,333333333 | 1,333333333 | 8,66666667  | 17,33333333 | 0           | 0,66666667  | 18,33333333 | 1           | 0,66666667  |
| 2016 | Canal         | VT-R1  | Early | 313,3333333 | 18,33333333 | 1098,66667  | 45,33333333 | 1,66666667  | 9,66666667  | 27,33333333 | 0           | 0,333333333 | 0           | 0,333333333 | 0           |
| 2016 | Bassanova2    | R2-R3  | Early | 1241,66667  | 3,333333333 | 475,666667  | 7           | 0,333333333 | 2,333333333 | 6           | 0,333333333 | 0,333333333 | 2           | 0           | 2,333333333 |
| 2016 | Ramon Vidal   | R2-R3  | Early | 570         | 13,6666667  | 441,3333333 | 4           | 0,66666667  | 3,333333333 | 22,6666667  | 3,333333333 | 7,333333333 | 12,6666667  | 0           | 3,333333333 |
| 2016 | Gimenells     | R2-R3  | Early | 645,3333333 | 11          | 620,3333333 | 4           | 29,6666667  | 2,66666667  | 35,33333333 | 2,333333333 | 11,33333333 | 11,6666667  | 0           | 9           |
| 2016 | Miguel Velo1  | VT-R1  | Early | 514,666667  | 6,333333333 | 967,3333333 | 50,6666667  | 11,33333333 | 5,66666667  | 78,33333333 | 1,333333333 | 5,333333333 | 10,6666667  | 0           | 42,33333333 |
| 2016 | Altorrico2    | VT-R1  | Late  | 352,3333333 | 17,6666667  | 947,666667  | 19,6666667  | 2,66666667  | 4           | 38,6666667  | 1           | 1,66666667  | 7           | 1,333333333 | 3,66666667  |
| 2016 | Canal         | R4-R5  | Early | 162         | 8,66666667  | 5,333333333 | 45          | 19,6666667  | 0,66666667  | 45          | 6           | 0,333333333 | 0,66666667  | 0           | 3,333333333 |
| 2016 | Altorrico1    | VT-R1  | Late  | 87          | 0,333333333 | 70          | 25,33333333 | 0,66666667  | 1           | 6           | 0           | 0,333333333 | 15,6666667  | 0           | 15,6666667  |
| 2016 | Sucs          | R4-R5  | Early | 11,33333333 | 0,333333333 | 16,6666667  | 1,333333333 | 0           | 0           | 2           | 5,333333333 | 0,66666667  | 0           | 0           | 1           |
| 2016 | Altorrico2    | R4-R5  | Late  | 294         | 14          | 83,6666667  | 8,66666667  | 3           | 1,66666667  | 35,33333333 | 19,33333333 | 0,333333333 | 8,333333333 | 0,66666667  | 1,66666667  |
| 2016 | Aeropuerto    | R2-R3  | Late  | 57          | 2,333333333 | 83          | 20,33333333 | 1           | 1,66666667  | 13,6666667  | 0,333333333 | 0           | 1,333333333 | 0,333333333 | 7,66666667  |
| 2016 | Jardiland     | R2-R3  | Late  | 87,6666667  | 6           | 109,666667  | 29,33333333 | 3,66666667  | 3,66666667  | 22,6666667  | 2           | 2,333333333 | 2,333333333 | 0           | 0           |
| 2016 | Ramon Vidal   | R4-R5  | Early | 233,3333333 | 1,333333333 | 177,3333333 | 5,66666667  | 2,66666667  | 2,66666667  | 1,66666667  | 34          | 7,333333333 | 7,333333333 | 0           | 0,66666667  |
| 2016 | Josep Tomás   | VT-R1  | Late  | 240,3333333 | 13          | 310,3333333 | 12          | 22,33333333 | 4,66666667  | 79,6666667  | 10,33333333 | 3,66666667  | 34,33333333 | 0           | 9,333333333 |

Supplementary material: The influence of planting periods on herbivore and natural enemy abundance on yellow sticky traps in Bt maize fields. Clemente-Orta et. al

|      |               |       |       |             |             |             |             |            |            |             |             |             |             |            |            |
|------|---------------|-------|-------|-------------|-------------|-------------|-------------|------------|------------|-------------|-------------|-------------|-------------|------------|------------|
| 2016 | Bassanova2    | R6    | Early | 54          | 1,66666667  | 97,6666667  | 1,66666667  | 0          | 0,33333333 | 9,66666667  | 2,33333333  | 0,33333333  | 0           | 0,33333333 | 0          |
| 2016 | Gimenells     | R6    | Early | 175         | 31          | 105         | 3,33333333  | 74         | 4,33333333 | 28,6666667  | 2,33333333  | 13,33333333 | 5           | 0          | 1          |
| 2016 | Alcarras-Gim1 | R4-R5 | Late  | 49          | 1           | 15          | 21          | 1,33333333 | 0,33333333 | 3,66666667  | 0,33333333  | 0           | 1           | 0          | 8,66666667 |
| 2016 | Miguel Velo1  | R2-R3 | Early | 60          | 4,66666667  | 33,6666667  | 3,66666667  | 1          | 2          | 17,33333333 | 62,6666667  | 1           | 0,66666667  | 0          | 0          |
| 2016 | Manoleta      | R2-R3 | Early | 6,33333333  | 0           | 107,666667  | 3,66666667  | 0,66666667 | 0,66666667 | 9           | 22          | 0           | 0,66666667  | 0          | 3,66666667 |
| 2016 | Mirador       | R2-R3 | Early | 55,33333333 | 1,33333333  | 19,6666667  | 1,33333333  | 0,66666667 | 2          | 22,6666667  | 11          | 0           | 0,33333333  | 0          | 0          |
| 2016 | Nyaco         | R2-R3 | Early | 192,666667  | 1,66666667  | 16,6666667  | 4           | 1          | 2,66666667 | 11          | 13          | 0           | 0           | 1,33333333 | 1,66666667 |
| 2016 | Vencillo      | R2-R3 | Early | 1180,333333 | 9           | 20          | 0,33333333  | 5          | 5,66666667 | 12          | 11,6666667  | 0,66666667  | 14,33333333 | 0,66666667 | 5,66666667 |
| 2016 | Pantano       | R2-R3 | Late  | 43,33333333 | 8           | 36,6666667  | 6           | 4,33333333 | 5,66666667 | 24          | 42,33333333 | 2,66666667  | 2,66666667  | 0          | 11,6666667 |
| 2016 | Alcarras-Gim2 | R4-R5 | Early | 108,333333  | 7,66666667  | 30,33333333 | 15,33333333 | 2,66666667 | 0,66666667 | 7,66666667  | 0,66666667  | 0,66666667  | 1           | 0,33333333 | 15         |
| 2016 | Alcarras      | R4-R5 | Late  | 214,666667  | 1           | 235,666667  | 47,6666667  | 4,33333333 | 1          | 4,33333333  | 0,66666667  | 2,33333333  | 2           | 0          | 0,66666667 |
| 2016 | Miguel Velo2  | R2-R3 | Early | 138,666667  | 5           | 13          | 1,66666667  | 4,33333333 | 6          | 5,66666667  | 0,66666667  | 0,33333333  | 0           | 0          | 2,66666667 |
| 2016 | Diarte        | R6    | Early | 27,33333333 | 0           | 36          | 1,66666667  | 2,66666667 | 0,33333333 | 11,33333333 | 2           | 1,33333333  | 0,33333333  | 0          | 1,33333333 |
| 2016 | Circuito      | R4-R5 | Late  | 38,33333333 | 0           | 131         | 2,33333333  | 17,6666667 | 1,33333333 | 10,33333333 | 19,33333333 | 1,33333333  | 7           | 0          | 0,33333333 |
| 2016 | Aurora        | R4-R5 | Early | 38,33333333 | 2,66666667  | 199,333333  | 0           | 0,33333333 | 2          | 5,66666667  | 167         | 6           | 0           | 0          | 0          |
| 2016 | Altorrico2    | R6    | Late  | 31,6666667  | 6,33333333  | 2,33333333  | 6           | 2          | 4          | 6,66666667  | 5,66666667  | 0           | 1,33333333  | 0,33333333 | 0,66666667 |
| 2016 | Altorrico1    | R4-R5 | Late  | 9,33333333  | 1           | 3           | 5,33333333  | 0,33333333 | 1          | 1,66666667  | 11,6666667  | 0,33333333  | 0           | 0          | 1          |
| 2016 | Bassanova2    | R6    | Early | 13,6666667  | 0,33333333  | 216,333333  | 4,66666667  | 0,33333333 | 0          | 0,66666667  | 48,6666667  | 1,33333333  | 0,33333333  | 0          | 1,33333333 |
| 2016 | Ramon Vidal   | R6    | Early | 130         | 1           | 157         | 6           | 8,66666667 | 1,66666667 | 3,66666667  | 9,66666667  | 3           | 6,33333333  | 0          | 1,33333333 |
| 2016 | Pantano       | R6    | Late  | 60          | 1,33333333  | 4           | 2,33333333  | 7,33333333 | 2          | 5,33333333  | 19,33333333 | 3           | 4,33333333  | 0          | 3,33333333 |
| 2016 | Manoleta      | R6    | Early | 7,33333333  | 0           | 4,33333333  | 3           | 1          | 2          | 14          | 23          | 4           | 0           | 0          | 14,6666667 |
| 2016 | Alcarras-Gim1 | R6    | Late  | 8,33333333  | 0           | 2,33333333  | 22,33333333 | 1,66666667 | 0          | 2,33333333  | 2           | 0           | 0,33333333  | 0          | 2,33333333 |
| 2016 | Alcarras-Gim2 | R6    | Early | 24,6666667  | 1,33333333  | 8           | 36,33333333 | 7,66666667 | 0,66666667 | 5           | 8,33333333  | 0,33333333  | 0           | 0          | 1          |
| 2016 | Aeropuerto    | R2-R3 | Late  | 1           | 0           | 20          | 0           | 4,66666667 | 1,33333333 | 4           | 4,33333333  | 0           | 0           | 0          | 0          |
| 2016 | Circuito      | R6    | Late  | 11          | 0           | 71          | 0,33333333  | 8          | 1          | 1           | 12,6666667  | 2           | 0           | 0          | 0,66666667 |
| 2016 | Aurora        | R6    | Early | 8           | 0,66666667  | 120,666667  | 1,33333333  | 5          | 2,33333333 | 1           | 4,66666667  | 5,66666667  | 0           | 0          | 1          |
| 2016 | Sucs          | R4-R5 | Early | 5,66666667  | 0           | 22,6666667  | 1,33333333  | 0          | 0          | 0,66666667  | 3           | 0,33333333  | 0           | 0          | 0,33333333 |
| 2016 | Miguel Velo2  | R6    | Early | 227,666667  | 10,33333333 | 5,33333333  | 1,33333333  | 9          | 9          | 5,66666667  | 0,33333333  | 1,66666667  | 0           | 0,66666667 | 0,33333333 |

Supplementary material: The influence of planting periods on herbivore and natural enemy abundance on yellow sticky traps in Bt maize fields. Clemente-Orta et. al

|      |              |        |       |            |             |             |            |            |            |            |             |            |            |            |            |
|------|--------------|--------|-------|------------|-------------|-------------|------------|------------|------------|------------|-------------|------------|------------|------------|------------|
| 2016 | Jardiland    | R6     | Late  | 59         | 8,66666667  | 14          | 33,3333333 | 5,66666667 | 5          | 7,66666667 | 3,66666667  | 3          | 0          | 0,33333333 | 0          |
| 2016 | Vencillo     | R6     | Early | 70,3333333 | 11,66666667 | 7,66666667  | 0          | 1,33333333 | 5          | 3,33333333 | 27,66666667 | 1          | 3,66666667 | 0,33333333 | 0,33333333 |
| 2016 | Diarte       | R4-R5  | Early | 12         | 0           | 13,66666667 | 1,33333333 | 0,33333333 | 1,33333333 | 1,33333333 | 0,66666667  | 5,33333333 | 0          | 0          | 0,33333333 |
| 2016 | Mirador      | R6     | Early | 31         | 5,33333333  | 5           | 2          | 1          | 2,66666667 | 3          | 33,3333333  | 4,33333333 | 0,33333333 | 0          | 0          |
| 2016 | Miguel Velo1 | R6     | Early | 12         | 0           | 3,66666667  | 12         | 0,66666667 | 5          | 6,66666667 | 1,33333333  | 0,33333333 | 0          | 0          | 0          |
| 2016 | Josep Tomás  | R2-R3  | Late  | 16,3333333 | 2,66666667  | 13,66666667 | 10,3333333 | 3,66666667 | 4          | 30,6666667 | 5,66666667  | 1          | 6,33333333 | 0          | 0,33333333 |
| 2016 | Alcarras     | R6     | Late  | 5          | 0           | 5,66666667  | 13,6666667 | 1,33333333 | 2          | 9          | 0,66666667  | 0,33333333 | 0          | 0          | 0          |
| 2016 | Canal        | R4-R5  | Early | 92         | 2,33333333  | 8,66666667  | 2          | 14,3333333 | 10         | 2,66666667 | 4,33333333  | 1,66666667 | 0,66666667 | 0,33333333 | 0          |
| 2016 | Nyaco        | R6     | Early | 87,3333333 | 4           | 7           | 7          | 2,33333333 | 3,33333333 | 7,66666667 | 3           | 0          | 0          | 0,33333333 | 2          |
| 2015 | alc gim 2    | V8-V16 | Late  | 373,666667 | 24,6666667  | 0           | 22,3333333 | 0          | 4,66666667 | 0          | 0,66666667  | 0          | 2,33333333 | 0          | 1          |
| 2015 | Josep Tomas  | VT-R1  | Early | 525,333333 | 15,3333333  | 6,66666667  | 25         | 0          | 0,33333333 | 20,3333333 | 2,66666667  | 7          | 3          | 0          | 4,66666667 |
| 2015 | Diarte       | VT-R1  | Early | 554        | 27          | 14,3333333  | 22,6666667 | 0          | 0,33333333 | 2,33333333 | 12,6666667  | 0,33333333 | 3          | 0          | 5          |
| 2015 | Nyaco        | V8-V16 | Late  | 2585       | 57          | 113,333333  | 16         | 0          | 10,6666667 | 4          | 0,66666667  | 2,33333333 | 11         | 0          | 0,66666667 |
| 2015 | Bassanova 2  | V8-V16 | Early | 119        | 10,3333333  | 53,6666667  | 28,3333333 | 0          | 0,33333333 | 2,66666667 | 1           | 0          | 1,33333333 | 0          | 4          |
| 2015 | Vencillo     | V8-V16 | Late  | 1982,66667 | 63,3333333  | 5,66666667  | 7,33333333 | 0          | 2,33333333 | 6          | 0,66666667  | 0,66666667 | 5,66666667 | 0,33333333 | 3,33333333 |
| 2015 | alc gim 2    | VT-R1  | Late  | 222,666667 | 6,33333333  | 207         | 48,3333333 | 0          | 1,66666667 | 2,33333333 | 7           | 0,33333333 | 0,33333333 | 0          | 8,33333333 |
| 2015 | Josep Tomas  | R2-R3  | Early | 627,333333 | 4,33333333  | 306,333333  | 9          | 0          | 2,33333333 | 16,3333333 | 0,33333333  | 7          | 19         | 0,33333333 | 3,66666667 |
| 2015 | Diarte       | R2-R3  | Early | 312,666667 | 2           | 93,3333333  | 3,66666667 | 0          | 2,33333333 | 2,33333333 | 6,33333333  | 0          | 0,66666667 | 0,33333333 | 2,33333333 |
| 2015 | Nyaco        | V8-V16 | Late  | 629,666667 | 6           | 51          | 25,6666667 | 0          | 0,66666667 | 4          | 1,66666667  | 1,33333333 | 2,33333333 | 0,33333333 | 1,33333333 |
| 2015 | Bassanova 2  | R2-R3  | Early | 171,666667 | 2           | 1368,33333  | 8          | 0          | 0,33333333 | 2          | 1           | 4,33333333 | 1          | 0          | 2          |
| 2015 | Vencillo     | VT-R1  | Late  | 72         | 0,33333333  | 53          | 8,33333333 | 0          | 0          | 1,33333333 | 1,33333333  | 0          | 0          | 0          | 0,66666667 |
| 2015 | alc gim 2    | R4-R5  | Late  | 281,666667 | 5           | 64,3333333  | 54         | 0          | 1,33333333 | 0          | 0           | 1          | 0          | 0,33333333 | 0          |
| 2015 | Josep Tomas  | R4-R5  | Early | 288        | 4,33333333  | 164         | 2,33333333 | 0          | 1          | 14         | 1           | 2,66666667 | 4,33333333 | 0,66666667 | 5,66666667 |
| 2015 | Diarte       | R4-R5  | Early | 23,6666667 | 3,33333333  | 80          | 3,33333333 | 0          | 1,66666667 | 1,33333333 | 0           | 5          | 0,33333333 | 0          | 2,33333333 |
| 2015 | Nyaco        | R2-R3  | Late  | 29,6666667 | 0,33333333  | 21,6666667  | 7,33333333 | 0          | 0,33333333 | 1,66666667 | 11          | 0,33333333 | 0          | 0          | 0          |
| 2015 | Bassanova 2  | R4-R5  | Early | 150        | 1,33333333  | 116,333333  | 5          | 0          | 0,33333333 | 1,66666667 | 1           | 4          | 1,33333333 | 0          | 1,66666667 |
| 2015 | Vencillo     | R4-R5  | Late  | 42,6666667 | 2,33333333  | 6,33333333  | 1,66666667 | 0          | 0,66666667 | 2,66666667 | 0,33333333  | 0,33333333 | 0          | 0          | 1          |
| 2015 | alc gim 2    | R6     | Late  | 19,6666667 | 4           | 3,66666667  | 18,3333333 | 0          | 2,66666667 | 0,33333333 | 0,33333333  | 4          | 0,66666667 | 1          | 0,33333333 |

Supplementary material: The influence of planting periods on herbivore and natural enemy abundance on yellow sticky traps in Bt maize fields. Clemente-Orta et. al

|      |             |    |       |            |            |            |            |   |            |            |            |            |            |            |            |
|------|-------------|----|-------|------------|------------|------------|------------|---|------------|------------|------------|------------|------------|------------|------------|
| 2015 | Josep Tomas | R6 | Early | 60,6666667 | 8          | 14         | 2,33333333 | 0 | 17,3333333 | 3          | 0,33333333 | 1,33333333 | 0          | 0,33333333 | 4,66666667 |
| 2015 | Diarte      | R6 | Early | 21,6666667 | 0,33333333 | 8          | 4,33333333 | 0 | 3,33333333 | 0,33333333 | 0          | 5,33333333 | 0          | 0          | 0,33333333 |
| 2015 | Nyaco       | R6 | Late  | 25,6666667 | 0          | 4,66666667 | 5,66666667 | 0 | 0,33333333 | 0,33333333 | 0,33333333 | 0          | 0          | 0          | 0,33333333 |
| 2015 | Bassanova 2 | R6 | Early | 10,6666667 | 1          | 20         | 10         | 0 | 0,33333333 | 1          | 0,66666667 | 4,33333333 | 0          | 0          | 0          |
| 2015 | Vencillo    | R6 | Late  | 15         | 1,33333333 | 2,66666667 | 0,66666667 | 0 | 1          | 0,33333333 | 0          | 0,33333333 | 0,33333333 | 0          | 0,33333333 |



## S2. Extra model results regarding Figure 2. Poshocs results.

### Orius sp

Estimate Std. Error z value Pr(>|z|)

(R2-R3) - (R4-R5) == 0 0.1129 0.2328 0.485 0.9967  
 (R2-R3) - R6 == 0 0.6864 0.2285 3.004 0.0317 \*  
 (R2-R3) - (V1-V7) == 0 1.2989 0.2649 4.904 <0.001 \*\*\*  
 (R2-R3) - (V8-V16) == 0 -0.3218 0.2309 -1.394 0.7296  
 (R2-R3) - (VT-R1) == 0 -0.6264 0.2282 -2.745 0.0662 .  
 (R4-R5) - R6 == 0 0.5735 0.2257 2.541 0.1115  
 (R4-R5) - (V1-V7) == 0 1.1860 0.2554 4.644 <0.001 \*\*\*  
 (R4-R5) - (V8-V16) == 0 -0.4347 0.2224 -1.954 0.3672  
 (R4-R5) - (VT-R1) == 0 -0.7393 0.2224 -3.325 0.0113 \*  
 R6 - (V1-V7) == 0 0.6125 0.2624 2.334 0.1791  
 R6 - (V8-V16) == 0 -1.0082 0.2266 -4.450 <0.001 \*\*\*  
 R6 - (VT-R1) == 0 -1.3127 0.2264 -5.798 <0.001 \*\*\*  
 (V1-V7) - (V8-V16) == 0 -1.6207 0.2665 -6.081 <0.001 \*\*\*  
 (V1-V7) - (VT-R1) == 0 -1.9252 0.2547 -7.558 <0.001 \*\*\*  
 (V8-V16) - (VT-R1) == 0 -0.3046 0.2305 -1.322  
 0.7719

### Syrphidae

Estimate Std. Error z value Pr(>|z|)

(R2-R3) - (R4-R5) == 0 -0.24322 0.83070 -0.293 0.99968  
 (R2-R3) - R6 == 0 -0.31737 0.83962 -0.378 0.99889  
 (R2-R3) - (V1-V7) == 0 -3.08398 0.71442 -4.317 <0.001 \*\*\*  
 (R2-R3) - (V8-V16) == 0 -1.58399 0.77350 -2.048 0.29797  
 (R2-R3) - (VT-R1) == 0 -0.43897 0.82782 -0.530 0.99441  
 (R4-R5) - R6 == 0 -0.07415 0.66785 -0.111 1.00000  
 (R4-R5) - (V1-V7) == 0 -2.84076 0.49707 -5.715 <0.001 \*\*\*  
 (R4-R5) - (V8-V16) == 0 -1.34077 0.59090 -2.269 0.19362  
 (R4-R5) - (VT-R1) == 0 -0.19575 0.65441 -0.299 0.99964

R6 - (V1-V7) == 0    -2.76661    0.52078   -5.312 < 0.001 \*\*\*  
 R6 - (V8-V16) == 0    -1.26662    0.59571   -2.126 0.25805  
 R6 - (VT-R1) == 0    -0.12160    0.66490   -0.183 0.99997  
 (V1-V7) - (V8-V16) == 0    1.49999    0.41730    3.595 0.00424 \*\*  
 (V1-V7) - (VT-R1) == 0    2.64501    0.50061    5.284 < 0.001 \*\*\*  
 (V8-V16) - (VT-R1) == 0    1.14502    0.58939    1.943  
 0.35752

### **Aeolothrips sp**

Estimate Std. Error z value Pr(>|z|)

(R2-R3) - (R4-R5) == 0    0.8315    0.3403    2.444    0.140  
 (R2-R3) - R6 == 0    1.5343    0.3741    4.102 <0.001 \*\*\*  
 (R2-R3) - (V1-V7) == 0    -2.1936    0.3461   -6.339 <0.001 \*\*\*  
 (R2-R3) - (V8-V16) == 0    -1.9207    0.3245   -5.919 <0.001 \*\*\*  
 (R2-R3) - (VT-R1) == 0    -1.5369    0.3319   -4.631 <0.001 \*\*\*  
 (R4-R5) - R6 == 0    0.7028    0.3769    1.865    0.422  
 (R4-R5) - (V1-V7) == 0    -3.0251    0.3346   -9.041 <0.001 \*\*\*  
 (R4-R5) - (V8-V16) == 0    -2.7522    0.3251   -8.466 <0.001 \*\*\*  
 (R4-R5) - (VT-R1) == 0    -2.3684    0.3268   -7.247 <0.001 \*\*\*  
 R6 - (V1-V7) == 0    -3.7280    0.3789   -9.840 <0.001 \*\*\*  
 R6 - (V8-V16) == 0    -3.4550    0.3540   -9.761 <0.001 \*\*\*  
 R6 - (VT-R1) == 0    -3.0712    0.3634   -8.450 <0.001 \*\*\*  
 (V1-V7) - (V8-V16) == 0    0.2730    0.3332    0.819    0.964  
 (V1-V7) - (VT-R1) == 0    0.6567    0.3155    2.082    0.295  
 (V8-V16) - (VT-R1) == 0    0.3838    0.3101    1.237  
 0.817

### **Coccinellidae**

Estimate Std. Error z value Pr(>|z|)

(R2-R3) - (R4-R5) == 0    0.7145    0.3135    2.279    0.2014

```

(R2-R3) - R6 == 0    1.3100  0.3253  4.027  <0.001 ***
(R2-R3) - (V1-V7) == 0  0.3692  0.3290  1.122  0.8717
(R2-R3) - (V8-V16) == 0  0.3968  0.3052  1.300  0.7842
(R2-R3) - (VT-R1) == 0 -0.2792  0.2905 -0.961  0.9297
(R4-R5) - R6 == 0    0.5955  0.3406  1.748  0.4981
(R4-R5) - (V1-V7) == 0 -0.3454  0.3419 -1.010  0.9143
(R4-R5) - (V8-V16) == 0 -0.3178  0.3181 -0.999  0.9179
(R4-R5) - (VT-R1) == 0 -0.9937  0.3113 -3.193  0.0177 *
R6 - (V1-V7) == 0    -0.9408  0.3669 -2.564  0.1057
R6 - (V8-V16) == 0   -0.9132  0.3340 -2.734  0.0682 .
R6 - (VT-R1) == 0    -1.5892  0.3222 -4.932  <0.001 ***
(V1-V7) - (V8-V16) == 0  0.0276  0.3437  0.080  1.0000
(V1-V7) - (VT-R1) == 0 -0.6484  0.3313 -1.957  0.3656
(V8-V16) - (VT-R1) == 0 -0.6760  0.3009 -2.247
0.2152

```

### **Sthethorus**

Estimate Std. Error z value Pr(>|z|)

```

(R2-R3) - (R4-R5) == 0 -0.51703  0.34535 -1.497  0.6619
(R2-R3) - R6 == 0    -0.01492  0.32720 -0.046  1.0000
(R2-R3) - (V1-V7) == 0  2.25775  0.39468  5.720  <0.001 ***
(R2-R3) - (V8-V16) == 0  3.03252  0.42431  7.147  <0.001 ***
(R2-R3) - (VT-R1) == 0  1.10045  0.36595  3.007  0.0310 *
(R4-R5) - R6 == 0    0.50211  0.32030  1.568  0.6157
(R4-R5) - (V1-V7) == 0  2.77478  0.37549  7.390  <0.001 ***
(R4-R5) - (V8-V16) == 0  3.54955  0.40690  8.723  <0.001 ***
(R4-R5) - (VT-R1) == 0  1.61748  0.33798  4.786  <0.001 ***
R6 - (V1-V7) == 0    2.27267  0.37568  6.049  <0.001 ***
R6 - (V8-V16) == 0    3.04744  0.40936  7.444  <0.001 ***
R6 - (VT-R1) == 0    1.11537  0.34777  3.207  0.0166 *

```

(V1-V7) - (V8-V16) == 0 0.77477 0.46357 1.671 0.5461  
 (V1-V7) - (VT-R1) == 0 -1.15730 0.40533 -2.855 0.0482 \*  
 (V8-V16) - (VT-R1) == 0 -1.93207 0.43245 -4.468  
 <0.001 \*\*\*

#### **F. occidentalis**

Estimate Std. Error z value Pr(>|z|)

(R2-R3) - (R4-R5) == 0 0.5456 0.2589 2.107 0.28287  
 (R2-R3) - R6 == 0 1.3207 0.2628 5.025 < 0.001 \*\*\*  
 (R2-R3) - (V1-V7) == 0 -0.5881 0.2820 -2.086 0.29391  
 (R2-R3) - (V8-V16) == 0 -1.5379 0.2773 -5.545 < 0.001 \*\*\*  
 (R2-R3) - (VT-R1) == 0 -0.4749 0.2696 -1.762 0.48983  
 (R4-R5) - R6 == 0 0.7751 0.2519 3.077 0.02551 \*  
 (R4-R5) - (V1-V7) == 0 -1.1337 0.2706 -4.190 < 0.001 \*\*\*  
 (R4-R5) - (V8-V16) == 0 -2.0835 0.2647 -7.872 < 0.001 \*\*\*  
 (R4-R5) - (VT-R1) == 0 -1.0205 0.2533 -4.029 < 0.001 \*\*\*  
 R6 - (V1-V7) == 0 -1.9089 0.2734 -6.982 < 0.001 \*\*\*  
 R6 - (V8-V16) == 0 -2.8586 0.2693 -10.615 < 0.001 \*\*\*  
 R6 - (VT-R1) == 0 -1.7957 0.2564 -7.005 < 0.001 \*\*\*  
 (V1-V7) - (V8-V16) == 0 -0.9498 0.2941 -3.229 0.01566 \*  
 (V1-V7) - (VT-R1) == 0 0.1132 0.2786 0.406 0.99858  
 (V8-V16) - (VT-R1) == 0 1.0630 0.2713 3.918  
 0.00126 \*\*

#### **Other herbivore thrips**

Estimate Std. Error z value Pr(>|z|)

(R2-R3) - (R4-R5) == 0 0.1860 0.2577 0.722 0.9793  
 (R2-R3) - R6 == 0 0.3799 0.2565 1.481 0.6758  
 (R2-R3) - (V1-V7) == 0 -3.6892 0.2499 -14.763 < 0.001 \*\*\*  
 (R2-R3) - (V8-V16) == 0 -2.9386 0.2488 -11.811 < 0.001 \*\*\*  
 (R2-R3) - (VT-R1) == 0 -1.0333 0.2507 -4.121 < 0.001 \*\*\*

```
(R4-R5) - R6 == 0    0.1939  0.2522  0.769  0.9726
(R4-R5) - (V1-V7) == 0 -3.8752  0.2445 -15.851 <0.001 ***
(R4-R5) - (V8-V16) == 0 -3.1246  0.2369 -13.191 <0.001 ***
(R4-R5) - (VT-R1) == 0 -1.2193  0.2449 -4.979 <0.001 ***
R6 - (V1-V7) == 0    -4.0692  0.2507 -16.234 <0.001 ***
R6 - (V8-V16) == 0   -3.3185  0.2429 -13.662 <0.001 ***
R6 - (VT-R1) == 0    -1.4132  0.2400 -5.888 <0.001 ***
(V1-V7) - (V8-V16) == 0  0.7506  0.2247  3.341  0.0107 *
(V1-V7) - (VT-R1) == 0  2.6560  0.2406 11.038 <0.001 ***
(V8-V16) - (VT-R1) == 0  1.9053  0.2353  8.099
<0.001 ***
```

### **Z. scutellaris**

Estimate Std. Error z value Pr(>|z|)

```
(R2-R3) - (R4-R5) == 0  0.996924  0.278337  3.582  0.00458 **
(R2-R3) - R6 == 0     1.998278  0.286943  6.964 < 0.001 ***
(R2-R3) - (V1-V7) == 0  0.002275  0.322001  0.007  1.00000
(R2-R3) - (V8-V16) == 0 -0.169626  0.298671 -0.568  0.99302
(R2-R3) - (VT-R1) == 0 -1.309646  0.300382 -4.360 < 0.001 ***
(R4-R5) - R6 == 0     1.001354  0.268483  3.730  0.00265 **
(R4-R5) - (V1-V7) == 0 -0.994649  0.303496 -3.277  0.01335 *
(R4-R5) - (V8-V16) == 0 -1.166551  0.278616 -4.187 < 0.001 ***
(R4-R5) - (VT-R1) == 0 -2.306570  0.284136 -8.118 < 0.001 ***
R6 - (V1-V7) == 0     -1.996002  0.315190 -6.333 < 0.001 ***
R6 - (V8-V16) == 0    -2.167904  0.286259 -7.573 < 0.001 ***
R6 - (VT-R1) == 0     -3.307923  0.290076 -11.404 < 0.001 ***
(V1-V7) - (V8-V16) == 0 -0.171902  0.315419 -0.545  0.99424
(V1-V7) - (VT-R1) == 0 -1.311921  0.302628 -4.335 < 0.001 ***
(V8-V16) - (VT-R1) == 0 -1.140019  0.292691 -3.895
0.00146 **
```

### Aphid

Estimate Std. Error z value Pr(>|z|)

(R2-R3) - (R4-R5) == 0 0.34619 0.27536 1.257 0.8062  
(R2-R3) - R6 == 0 -0.32471 0.24023 -1.352 0.7535  
(R2-R3) - (V1-V7) == 0 -3.97175 0.24176 -16.429 <0.001 \*\*\*  
(R2-R3) - (V8-V16) == 0 -1.74977 0.22615 -7.737 <0.001 \*\*\*  
(R2-R3) - (VT-R1) == 0 -0.39676 0.24853 -1.596 0.5979  
(R4-R5) - R6 == 0 -0.67090 0.25370 -2.644 0.0858 .  
(R4-R5) - (V1-V7) == 0 -4.31794 0.24122 -17.900 <0.001 \*\*\*  
(R4-R5) - (V8-V16) == 0 -2.09596 0.24603 -8.519 <0.001 \*\*\*  
(R4-R5) - (VT-R1) == 0 -0.74295 0.26059 -2.851 0.0490 \*  
R6 - (V1-V7) == 0 -3.64704 0.21494 -16.968 <0.001 \*\*\*  
R6 - (V8-V16) == 0 -1.42506 0.20578 -6.925 <0.001 \*\*\*  
R6 - (VT-R1) == 0 -0.07205 0.22490 -0.320 0.9995  
(V1-V7) - (V8-V16) == 0 2.22198 0.21443 10.362 <0.001 \*\*\*  
(V1-V7) - (VT-R1) == 0 3.57499 0.22166 16.128 <0.001 \*\*\*  
(V8-V16) - (VT-R1) == 0 1.35301 0.21653 6.249  
<0.001 \*\*\*

### Empoasca sp.

Estimate Std. Error z value Pr(>|z|)

(R2-R3) - (R4-R5) == 0 0.07574 0.30375 0.249 0.99987  
(R2-R3) - R6 == 0 -0.05898 0.30783 -0.192 0.99996  
(R2-R3) - (V1-V7) == 0 -0.48186 0.31477 -1.531 0.64368  
(R2-R3) - (V8-V16) == 0 -0.97432 0.31702 -3.073 0.02583 \*  
(R2-R3) - (VT-R1) == 0 -0.20018 0.31075 -0.644 0.98759  
(R4-R5) - R6 == 0 -0.13472 0.29603 -0.455 0.99755  
(R4-R5) - (V1-V7) == 0 -0.55760 0.29960 -1.861 0.42587  
(R4-R5) - (V8-V16) == 0 -1.05006 0.30433 -3.450 0.00743 \*\*  
(R4-R5) - (VT-R1) == 0 -0.27592 0.29653 -0.930 0.93860  
R6 - (V1-V7) == 0 -0.42288 0.30812 -1.372 0.74322

R6 - (V8-V16) == 0 -0.91534 0.31004 -2.952 0.03724 \*  
R6 - (VT-R1) == 0 -0.14120 0.30786 -0.459 0.99746  
(V1-V7) - (V8-V16) == 0 -0.49245 0.33109 -1.487 0.67197  
(V1-V7) - (VT-R1) == 0 0.28168 0.30993 0.909 0.94425  
(V8-V16) - (VT-R1) == 0 0.77414 0.31752 2.438  
0.14311

### **L. striatellus**

Linear Hypotheses:

|                         | Estimate | Std. Error | z value | Pr(> z )    |
|-------------------------|----------|------------|---------|-------------|
| (R2-R3) - (R4-R5) == 0  | 0.03101  | 0.25595    | 0.121   | 1.00000     |
| (R2-R3) - R6 == 0       | 0.49043  | 0.25581    | 1.917   | 0.39040     |
| (R2-R3) - (V1-V7) == 0  | 0.20299  | 0.27984    | 0.725   | 0.97879     |
| (R2-R3) - (V8-V16) == 0 | -0.98752 | 0.26141    | -3.778  | 0.00226 **  |
| (R2-R3) - (VT-R1) == 0  | -1.01058 | 0.26059    | -3.878  | 0.00147 **  |
| (R4-R5) - R6 == 0       | 0.45941  | 0.23753    | 1.934   | 0.38005     |
| (R4-R5) - (V1-V7) == 0  | 0.17198  | 0.26044    | 0.660   | 0.98608     |
| (R4-R5) - (V8-V16) == 0 | -1.01854 | 0.24616    | -4.138  | < 0.001 *** |
| (R4-R5) - (VT-R1) == 0  | -1.04159 | 0.24530    | -4.246  | < 0.001 *** |
| R6 - (V1-V7) == 0       | -0.28744 | 0.27186    | -1.057  | 0.89775     |
| R6 - (V8-V16) == 0      | -1.47795 | 0.25063    | -5.897  | < 0.001 *** |
| R6 - (VT-R1) == 0       | -1.50101 | 0.25111    | -5.977  | < 0.001 *** |
| (V1-V7) - (V8-V16) == 0 | -1.19051 | 0.27906    | -4.266  | < 0.001 *** |
| (V1-V7) - (VT-R1) == 0  | -1.21357 | 0.27199    | -4.462  | < 0.001 *** |
| (V8-V16) - (VT-R1) == 0 | -0.02306 | 0.25238    | -0.091  | 1.00000     |

### S3. Extra model results regarding Figure 3 and 4. Poshoc.

Early date\_models, were letters means: a= 2015, b= 2016, c= 2017

Response: **Laodelphax**

Chisq Df Pr(>Chisq)

year 9.6093 2 0.008192 \*\*

---

Signif. codes: 0 '\*\*\*' 0.001 '\*\*' 0.01 '\*' 0.05 '.' 0.1 ' ' 1

> mod.emm <- emmeans(m3, ~ year)

> mod.emm

year emmean SE df asymp.LCL asymp.UCL

a 2.35 0.380 Inf 1.61 3.1

b 2.33 0.291 Inf 1.76 2.9

c 1.83 0.292 Inf 1.25 2.4

Results are given on the log (not the response) scale.

Confidence level used: 0.95

> summary(as.glht(pairs(mod.emm)))

#### Simultaneous Tests for General Linear Hypotheses

Linear Hypotheses:

Estimate Std. Error z value Pr(>|z|)

a - b == 0 0.01875 0.30639 0.061 0.99786

a - c == 0 0.52559 0.31516 1.668 0.20830

b - c == 0 0.50684 0.16849 3.008 0.00687 \*\*

Response: **F. occidentalis**

Chisq Df Pr(>Chisq)

year 41.374 2 1.037e-09 \*\*\*



```
---
Signif. codes:  0 '***' 0.001 '**' 0.01 '*' 0.05 '.' 0.1 ' ' 1
> mod.emm <- emmeans(m3, ~ year)
> mod.emm
year emmean   SE df asymp.LCL asymp.UCL
a    5.40 0.446 Inf   4.52    6.27
b    5.59 0.392 Inf   4.82    6.36
c    4.45 0.392 Inf   3.68    5.22
```

Results are given on the log (not the response) scale.

Confidence level used: 0.95

```
> summary(as.glht(pairs(mod.emm)))
```

#### Simultaneous Tests for General Linear Hypotheses

Linear Hypotheses:

```
Estimate Std. Error z value Pr(>|z|)
a - b == 0 -0.1949    0.2752 -0.708 0.75403
a - c == 0  0.9461    0.2816  3.360 0.00213 **
b - c == 0  1.1410    0.1805  6.321 < 1e-05 ***
```

```
---
Signif. codes:  0 '***' 0.001 '**' 0.01 '*' 0.05 '.' 0.1 ' ' 1
(Adjusted p values reported -- single-step method)
```

```
> multcomp::cld(mod.emm, alpha = 0.05, Letters = LETTERS) ##agrega las letras al poshoc
year emmean   SE df asymp.LCL asymp.UCL .group
c    4.45 0.392 Inf   3.68    5.22  A
a    5.40 0.446 Inf   4.52    6.27  B
b    5.59 0.392 Inf   4.82    6.36  B
```

Results are given on the log (not the response) scale.

Confidence level used: 0.95

P value adjustment: tukey method for comparing a family of 3 estimates

significance level used: alpha = 0.05

Response: **Other herbivore thrips**

```
Chisq Df Pr(>Chisq)
year 4.2073 2 0.122
> mod.emm <- emmeans(m3, ~ year)
> mod.emm
year emmean SE df asymp.LCL asymp.UCL
a 2.06 0.678 Inf 0.728 3.39
b 2.65 0.636 Inf 1.405 3.90
c 2.63 0.635 Inf 1.385 3.87
```

Results are given on the log (not the response) scale.

Confidence level used: 0.95

```
> summary(as.glht(pairs(mod.emm)))
```

#### Simultaneous Tests for General Linear Hypotheses

Linear Hypotheses:

```
Estimate Std. Error z value Pr(>|z|)
a - b == 0 -0.5941 0.2945 -2.017 0.103
a - c == 0 -0.5717 0.3024 -1.890 0.135
b - c == 0 0.0224 0.1713 0.131 0.990
```

(Adjusted p values reported -- single-step method)

```
> multcomp::cld(mod.emm, alpha = 0.05, Letters = LETTERS) ##agrega las letras al poshoc
```

```
year emmean SE df asymp.LCL asymp.UCL .group
a 2.06 0.678 Inf 0.728 3.39 A
```

```
c  2.63 0.635 Inf  1.385  3.87 A
b  2.65 0.636 Inf  1.405  3.90 A
```

Results are given on the log (not the response) scale.

Confidence level used: 0.95

P value adjustment: tukey method for comparing a family of 3 estimates

significance level used: alpha = 0.05

Response: **Z. scutellaris**

```
Chisq Df Pr(>Chisq)
year 39.217 2 3.049e-09 ***
---
Signif. codes:  0 '***' 0.001 '**' 0.01 '*' 0.05 '.' 0.1 ' ' 1
> mod.emm <- emmeans(m3, ~ year)
> mod.emm
year emmean SE df asymp.LCL asymp.UCL
a  4.46 0.533 Inf  3.42  5.51
b  4.78 0.458 Inf  3.88  5.68
c  3.63 0.457 Inf  2.73  4.52
```

Results are given on the log (not the response) scale.

Confidence level used: 0.95

```
> summary(as.glht(pairs(mod.emm)))
```

#### Simultaneous Tests for General Linear Hypotheses

Linear Hypotheses:

```
Estimate Std. Error z value Pr(>|z|)
a - b == 0 -0.3174  0.3468 -0.915  0.6205
a - c == 0  0.8354  0.3474  2.405  0.0399 *
```

```
b - c == 0 1.1527 0.1854 6.217 <1e-04 ***
```

```
---
```

```
Signif. codes: 0 '***' 0.001 '**' 0.01 '*' 0.05 '.' 0.1 ' ' 1
```

```
(Adjusted p values reported -- single-step method)
```

```
> multcomp::cld(mod.emm, alpha = 0.05, Letters = LETTERS) ##agrega las letras al poshoc
```

```
year emmean SE df asymp.LCL asymp.UCL .group
```

```
c 3.63 0.457 Inf 2.73 4.52 A
```

```
a 4.46 0.533 Inf 3.42 5.51 B
```

```
b 4.78 0.458 Inf 3.88 5.68 B
```

Results are given on the log (not the response) scale.

Confidence level used: 0.95

P value adjustment: tukey method for comparing a family of 3 estimates

significance level used: alpha = 0.05

Response: **Empoasca sp.**

Chisq Df Pr(>Chisq)

```
year 10265748 2 < 2.2e-16 ***
```

```
---
```

```
Signif. codes: 0 '***' 0.001 '**' 0.01 '*' 0.05 '.' 0.1 ' ' 1
```

```
> mod.emm <- emmeans(m3, ~ year)
```

```
> mod.emm
```

```
year emmean SE df asymp.LCL asymp.UCL
```

```
a -16.987 0.008396 Inf -17.003 -16.970
```

```
b 1.827 0.011868 Inf 1.804 1.850
```

```
c 2.259 0.011867 Inf 2.236 2.282
```

Results are given on the log (not the response) scale.

Confidence level used: 0.95

```
> summary(as.glht(pairs(mod.emm)))
```

### Simultaneous Tests for General Linear Hypotheses

#### Linear Hypotheses:

```
Estimate Std. Error z value Pr(>|z|)
a - b == 0 -18.813594 0.008394 -2241.22 <2e-16 ***
a - c == 0 -19.245705 0.008394 -2292.82 <2e-16 ***
b - c == 0 -0.432111 0.011863 -36.43 <2e-16 ***
---
```

Signif. codes: 0 '\*\*\*' 0.001 '\*\*' 0.01 '\*' 0.05 '.' 0.1 ' ' 1

(Adjusted p values reported -- single-step method)

```
> multcomp::cld(mod.emm, alpha = 0.05, Letters = LETTERS) ##agrega las letras al poshoc
```

```
year emmean SE df asymp.LCL asymp.UCL .group
a -16.987 0.008396 Inf -17.003 -16.970 A
b 1.827 0.011868 Inf 1.804 1.850 B
c 2.259 0.011867 Inf 2.236 2.282 C
```

Results are given on the log (not the response) scale.

Confidence level used: 0.95

P value adjustment: tukey method for comparing a family of 3 estimates

significance level used: alpha = 0.05

#### Response: **Aphid**

```
Chisq Df Pr(>Chisq)
year 15.437 2 0.0004445 ***
```

---

Signif. codes: 0 '\*\*\*' 0.001 '\*\*' 0.01 '\*' 0.05 '.' 0.1 ' ' 1

```
> mod.emm <- emmeans(m3, ~ year)
```

```
> mod.emm
```

|   | year | emmean | SE    | df  | asympt.LCL | asympt.UCL |
|---|------|--------|-------|-----|------------|------------|
| a |      | 1.04   | 0.649 | Inf | -0.228     | 2.31       |
| b |      | 1.96   | 0.604 | Inf | 0.772      | 3.14       |
| c |      | 1.53   | 0.605 | Inf | 0.347      | 2.72       |

Response: **Orius sp.**

|      | Chisq  | Df | Pr(>Chisq)    |
|------|--------|----|---------------|
| year | 40.548 | 2  | 1.567e-09 *** |

---

Signif. codes: 0 '\*\*\*' 0.001 '\*\*' 0.01 '\*' 0.05 '.' 0.1 ' ' 1

```
> mod.emm <- emmeans(m3, ~ year)
```

```
> mod.emm
```

|   | year | emmean | SE    | df  | asympt.LCL | asympt.UCL |
|---|------|--------|-------|-----|------------|------------|
| a |      | 0.809  | 0.373 | Inf | 0.0775     | 1.54       |
| b |      | 2.527  | 0.285 | Inf | 1.9681     | 3.09       |
| c |      | 2.037  | 0.286 | Inf | 1.4768     | 2.60       |

Results are given on the log (not the response) scale.

Confidence level used: 0.95

```
> summary(as.glht(pairs(mod.emm)))
```

#### Simultaneous Tests for General Linear Hypotheses

Linear Hypotheses:

|            | Estimate | Std. Error | z value | Pr(> z )    |
|------------|----------|------------|---------|-------------|
| a - b == 0 | -1.7179  | 0.2849     | -6.029  | < 1e-04 *** |
| a - c == 0 | -1.2273  | 0.2891     | -4.245  | < 1e-04 *** |
| b - c == 0 | 0.4905   | 0.1458     | 3.363   | 0.00204 **  |

---

Signif. codes: 0 '\*\*\*' 0.001 '\*\*' 0.01 '\*' 0.05 '.' 0.1 ' ' 1

(Adjusted p values reported -- single-step method)

```
> multcomp::cld(mod.emm, alpha = 0.05, Letters = LETTERS) ##agrega las letras al poshoc
year emmean SE df asymp.LCL asymp.UCL .group
a 0.809 0.373 Inf 0.0775 1.54 A
c 2.037 0.286 Inf 1.4768 2.60 B
b 2.527 0.285 Inf 1.9681 3.09 C
```

Results are given on the log (not the response) scale.

Confidence level used: 0.95

P value adjustment: tukey method for comparing a family of 3 estimates

significance level used: alpha = 0.05

Response: **Aeolothrips sp.**

```
Chisq Df Pr(>Chisq)
year 11.705 2 0.002873 **
```

---

Signif. codes: 0 '\*\*\*' 0.001 '\*\*' 0.01 '\*' 0.05 '.' 0.1 ' ' 1

```
> mod.emm <- emmeans(m3, ~ year)
```

```
> mod.emm
```

```
year emmean SE df asymp.LCL asymp.UCL
a 0.584 0.708 Inf -0.804 1.97
b 1.861 0.612 Inf 0.662 3.06
c 1.375 0.611 Inf 0.177 2.57
```

Results are given on the log (not the response) scale.

Confidence level used: 0.95

```
> summary(as.glht(pairs(mod.emm)))
```

# Simultaneous Tests for General Linear Hypotheses

## Linear Hypotheses:

```

      Estimate Std. Error z value Pr(>|z|)
a - b == 0 -1.2769    0.4234 -3.016  0.0066 **
a - c == 0 -0.7905    0.4325 -1.828  0.1517
b - c == 0  0.4864    0.2184  2.227  0.0621 .
---
Signif. codes:  0 '***' 0.001 '**' 0.01 '*' 0.05 '.' 0.1 ' ' 1
(Adjusted p values reported -- single-step method)

```

```

> multcomp::cld(mod.emm, alpha = 0.05, Letters = LETTERS) ##agrega las letras al poshoc
year emmean  SE df asymp.LCL asymp.UCL .group
a   0.584 0.708 Inf  -0.804    1.97  A
c   1.375 0.611 Inf   0.177    2.57  AB
b   1.861 0.612 Inf   0.662    3.06  B

```

Results are given on the log (not the response) scale.

Confidence level used: 0.95

P value adjustment: tukey method for comparing a family of 3 estimates

significance level used: alpha = 0.05

## Response: **Coccinellidae**

```

      Chisq Df Pr(>Chisq)
year 19.512  2 5.794e-05 ***
---
Signif. codes:  0 '***' 0.001 '**' 0.01 '*' 0.05 '.' 0.1 ' ' 1
> mod.emm <- emmeans(m3, ~ year)
> mod.emm
year emmean  SE df asymp.LCL asymp.UCL

```



```
a  0.706 0.354 Inf  0.0118  1.401
b  1.034 0.234 Inf  0.5748  1.494
c  0.160 0.243 Inf -0.3172  0.637
```

Results are given on the log (not the response) scale.

Confidence level used: 0.95

```
> summary(as.glht(pairs(mod.emm)))
```

#### Simultaneous Tests for General Linear Hypotheses

Linear Hypotheses:

Estimate Std. Error z value Pr(>|z|)

```
a - b == 0 -0.3277  0.3348 -0.979  0.581
```

```
a - c == 0  0.5465  0.3483  1.569  0.250
```

```
b - c == 0  0.8742  0.1979  4.417 <1e-04 ***
```

---

Signif. codes: 0 '\*\*\*' 0.001 '\*\*' 0.01 '\*' 0.05 '.' 0.1 ' ' 1

(Adjusted p values reported -- single-step method)

```
> multcomp::cld(mod.emm, alpha = 0.05, Letters = LETTERS) ##agrega las letras al poshoc
```

```
year emmean SE df asymp.LCL asymp.UCL .group
```

```
c  0.160 0.243 Inf -0.3172  0.637 A
```

```
a  0.706 0.354 Inf  0.0118  1.401 AB
```

```
b  1.034 0.234 Inf  0.5748  1.494 B
```

Results are given on the log (not the response) scale.

Confidence level used: 0.95

P value adjustment: tukey method for comparing a family of 3 estimates

significance level used: alpha = 0.05

**Late date\_models were letters means: a= 2015, b= 2016, c= 2017**

Response: **F. occidentalis**

Chisq Df Pr(>Chisq)  
year 41.374 2 1.037e-09 \*\*\*

---

Signif. codes: 0 '\*\*\*' 0.001 '\*\*' 0.01 '\*' 0.05 '.' 0.1 ' ' 1

> mod.emm <- emmeans(m3, ~ year)

> mod.emm

| year | emmean | SE    | df  | asympt.LCL | asympt.UCL |
|------|--------|-------|-----|------------|------------|
| a    | 5.40   | 0.446 | Inf | 4.52       | 6.27       |
| b    | 5.59   | 0.392 | Inf | 4.82       | 6.36       |
| c    | 4.45   | 0.392 | Inf | 3.68       | 5.22       |

Results are given on the log (not the response) scale.

Confidence level used: 0.95

> summary(as.glht(pairs(mod.emm)))

#### Simultaneous Tests for General Linear Hypotheses

Linear Hypotheses:

|            | Estimate | Std. Error | z value | Pr(> z )    |
|------------|----------|------------|---------|-------------|
| a - b == 0 | -0.1949  | 0.2752     | -0.708  | 0.75402     |
| a - c == 0 | 0.9461   | 0.2816     | 3.360   | 0.00215 **  |
| b - c == 0 | 1.1410   | 0.1805     | 6.321   | < 1e-04 *** |

---

Signif. codes: 0 '\*\*\*' 0.001 '\*\*' 0.01 '\*' 0.05 '.' 0.1 ' ' 1

(Adjusted p values reported -- single-step method)

```
> multcomp::cld(mod.emm, alpha = 0.05, Letters = LETTERS) ##agrega las letras al
poshoc
year emmean SE df asymp.LCL asymp.UCL .group
c 4.45 0.392 Inf 3.68 5.22 A
a 5.40 0.446 Inf 4.52 6.27 B
b 5.59 0.392 Inf 4.82 6.36 B
```

Results are given on the log (not the response) scale.

Confidence level used: 0.95

P value adjustment: tukey method for comparing a family of 3 estimates

significance level used: alpha = 0.05

Response: **other herbivore thrips**

```
Chisq Df Pr(>Chisq)
year 4.2073 2 0.122
```

Response: **Z. scutellaris**

```
Chisq Df Pr(>Chisq)
year 39.217 2 3.049e-09 ***
```

---

Signif. codes: 0 '\*\*\*' 0.001 '\*\*' 0.01 '\*' 0.05 '.' 0.1 ' ' 1

```
> mod.emm <- emmeans(m3, ~ year)
```

```
> mod.emm
```

```
year emmean SE df asymp.LCL asymp.UCL
a 4.46 0.533 Inf 3.42 5.51
b 4.78 0.458 Inf 3.88 5.68
c 3.63 0.457 Inf 2.73 4.52
```

Results are given on the log (not the response) scale.

Confidence level used: 0.95

```
> summary(as.glht(pairs(mod.emm)))
```

#### Simultaneous Tests for General Linear Hypotheses

Linear Hypotheses:

|            | Estimate | Std. Error | z value | Pr(> z )   |
|------------|----------|------------|---------|------------|
| a - b == 0 | -0.3174  | 0.3468     | -0.915  | 0.62       |
| a - c == 0 | 0.8354   | 0.3474     | 2.405   | 0.04 *     |
| b - c == 0 | 1.1527   | 0.1854     | 6.217   | <1e-04 *** |

---

Signif. codes: 0 '\*\*\*' 0.001 '\*\*' 0.01 '\*' 0.05 '.' 0.1 ' ' 1

(Adjusted p values reported -- single-step method)

```
> multcomp::cld(mod.emm, alpha = 0.05, Letters = LETTERS) ##agrega las letras al poshoc
```

|   | year | emmean | SE  | df   | asympt.LCL | asympt.UCL | group |
|---|------|--------|-----|------|------------|------------|-------|
| c | 3.63 | 0.457  | Inf | 2.73 | 4.52       | A          |       |
| a | 4.46 | 0.533  | Inf | 3.42 | 5.51       | B          |       |
| b | 4.78 | 0.458  | Inf | 3.88 | 5.68       | B          |       |

Results are given on the log (not the response) scale.

Confidence level used: 0.95

P value adjustment: tukey method for comparing a family of 3 estimates

significance level used: alpha = 0.05

Response: **Empoasca sp.**

|      | Chisq    | Df | Pr(>Chisq)    |
|------|----------|----|---------------|
| year | 10265748 | 2  | < 2.2e-16 *** |

```
---
Signif. codes:  0 '***' 0.001 '**' 0.01 '*' 0.05 '.' 0.1 ' ' 1
> mod.emm <- emmeans(m3, ~ year)
> mod.emm
  year  emmean    SE df asymp.LCL asymp.UCL
a  -16.987 0.008396 Inf -17.003 -16.970
b   1.827 0.011868 Inf  1.804  1.850
c   2.259 0.011867 Inf  2.236  2.282
```

Results are given on the log (not the response) scale.

Confidence level used: 0.95

```
> summary(as.glht(pairs(mod.emm)))
```

#### Simultaneous Tests for General Linear Hypotheses

Linear Hypotheses:

```
      Estimate Std. Error  z value Pr(>|z|)
a - b == 0 -18.813594   0.008394 -2241.22 <2e-16 ***
a - c == 0 -19.245705   0.008394 -2292.82 <2e-16 ***
b - c == 0  -0.432111   0.011863  -36.43 <2e-16 ***
```

```
---
Signif. codes:  0 '***' 0.001 '**' 0.01 '*' 0.05 '.' 0.1 ' ' 1
(Adjusted p values reported -- single-step method)
```

```
> multcomp::cld(mod.emm, alpha = 0.05, Letters = LETTERS) ##agrega las letras al
poshoc
  year  emmean    SE df asymp.LCL asymp.UCL .group
a  -16.987 0.008396 Inf -17.003 -16.970  A
b   1.827 0.011868 Inf  1.804  1.850  B
c   2.259 0.011867 Inf  2.236  2.282  C
```

Results are given on the log (not the response) scale.

Confidence level used: 0.95

P value adjustment: tukey method for comparing a family of 3 estimates

significance level used: alpha = 0.05

Response: **Aphid**

```
Chisq Df Pr(>Chisq)
year 15.437 2 0.0004445 ***
```

---

Signif. codes: 0 '\*\*\*' 0.001 '\*\*' 0.01 '\*' 0.05 '.' 0.1 ' ' 1

```
> mod.emm <- emmeans(m3, ~ year)
```

```
> mod.emm
```

|   | year | emmean | SE    | df  | asyp.LCL | asyp.UCL |
|---|------|--------|-------|-----|----------|----------|
| a |      | 1.04   | 0.649 | Inf | -0.228   | 2.31     |
| b |      | 1.96   | 0.604 | Inf | 0.772    | 3.14     |
| c |      | 1.53   | 0.605 | Inf | 0.347    | 2.72     |

Results are given on the log (not the response) scale.

Confidence level used: 0.95

```
> summary(as.glht(pairs(mod.emm)))
```

#### Simultaneous Tests for General Linear Hypotheses

Linear Hypotheses:

|            | Estimate | Std. Error | z value | Pr(> z )   |
|------------|----------|------------|---------|------------|
| a - b == 0 | -0.9128  | 0.2770     | -3.295  | 0.00264 ** |
| a - c == 0 | -0.4896  | 0.2933     | -1.669  | 0.20746    |
| b - c == 0 | 0.4232   | 0.1572     | 2.691   | 0.01816 *  |

---

Signif. codes: 0 '\*\*\*' 0.001 '\*\*' 0.01 '\*' 0.05 '.' 0.1 ' ' 1

(Adjusted p values reported -- single-step method)

```
> multcomp::cld(mod.emm, alpha = 0.05, Letters = LETTERS) ##agrega las letras al
poshoc
year emmean SE df asymp.LCL asymp.UCL .group
a 1.04 0.649 Inf -0.228 2.31 A
c 1.53 0.605 Inf 0.347 2.72 A
b 1.96 0.604 Inf 0.772 3.14 B
```

Results are given on the log (not the response) scale.

Confidence level used: 0.95

P value adjustment: tukey method for comparing a family of 3 estimates

significance level used: alpha = 0.05

Response: **L. striatellus**

```
Chisq Df Pr(>Chisq)
year 9.6093 2 0.008192 **
```

---

Signif. codes: 0 '\*\*\*' 0.001 '\*\*' 0.01 '\*' 0.05 '.' 0.1 ' ' 1

```
> mod.emm <- emmeans(m3, ~ year)
```

```
> mod.emm
```

```
year emmean SE df asymp.LCL asymp.UCL
a 2.35 0.380 Inf 1.61 3.1
b 2.33 0.291 Inf 1.76 2.9
c 1.83 0.292 Inf 1.25 2.4
```

Results are given on the log (not the response) scale.

Confidence level used: 0.95

```
> summary(as.glht(pairs(mod.emm)))
```

# Simultaneous Tests for General Linear Hypotheses

Linear Hypotheses:

Estimate Std. Error z value Pr(>|z|)

a - b == 0 0.01875 0.30639 0.061 0.99786

a - c == 0 0.52559 0.31516 1.668 0.20831

b - c == 0 0.50684 0.16849 3.008 0.00686 \*\*

---

Signif. codes: 0 '\*\*\*' 0.001 '\*\*' 0.01 '\*' 0.05 '.' 0.1 ' ' 1

(Adjusted p values reported -- single-step method)

```
> multcomp::cld(mod.emm, alpha = 0.05, Letters = LETTERS) ##agrega las letras al
poshoc
```

```
year emmean SE df asymp.LCL asymp.UCL .group
```

```
c 1.83 0.292 Inf 1.25 2.4 A
```

```
b 2.33 0.291 Inf 1.76 2.9 B
```

```
a 2.35 0.380 Inf 1.61 3.1 AB
```

Results are given on the log (not the response) scale.

Confidence level used: 0.95

P value adjustment: tukey method for comparing a family of 3 estimates

significance level used: alpha = 0.05

Response: **Orius sp.**

Chisq Df Pr(>Chisq)

year 40.548 2 1.567e-09 \*\*\*

---

Signif. codes: 0 '\*\*\*' 0.001 '\*\*' 0.01 '\*' 0.05 '.' 0.1 ' ' 1

```
> mod.emm <- emmeans(m3, ~ year)
```

```
> mod.emm
```



```

year emmean SE df asymp.LCL asymp.UCL
a 0.809 0.373 Inf 0.0775 1.54
b 2.527 0.285 Inf 1.9681 3.09
c 2.037 0.286 Inf 1.4768 2.60

```

Results are given on the log (not the response) scale.

Confidence level used: 0.95

```
> summary(as.glht(pairs(mod.emm)))
```

### Simultaneous Tests for General Linear Hypotheses

Linear Hypotheses:

```

Estimate Std. Error z value Pr(>|z|)
a - b == 0 -1.7179 0.2849 -6.029 < 1e-04 ***
a - c == 0 -1.2273 0.2891 -4.245 < 1e-04 ***
b - c == 0 0.4905 0.1458 3.363 0.00205 **

```

---

Signif. codes: 0 '\*\*\*' 0.001 '\*\*' 0.01 '\*' 0.05 '.' 0.1 ' ' 1

(Adjusted p values reported -- single-step method)

```
> multcomp::cld(mod.emm, alpha = 0.05, Letters = LETTERS) ##agrega las letras al poshoc
```

```

year emmean SE df asymp.LCL asymp.UCL .group
a 0.809 0.373 Inf 0.0775 1.54 A
c 2.037 0.286 Inf 1.4768 2.60 B
b 2.527 0.285 Inf 1.9681 3.09 C

```

Results are given on the log (not the response) scale.

Confidence level used: 0.95

P value adjustment: tukey method for comparing a family of 3 estimates

significance level used: alpha = 0.05

Response: **Aeolothrips sp.**

```
Chisq Df Pr(>Chisq)
year 11.705 2 0.002873 **
```

---

Signif. codes: 0 '\*\*\*' 0.001 '\*\*' 0.01 '\*' 0.05 '.' 0.1 ' ' 1

```
> mod.emm <- emmeans(m3, ~ year)
```

```
> mod.emm
```

| year | emmean | SE    | df  | asympt.LCL | asympt.UCL |
|------|--------|-------|-----|------------|------------|
| a    | 0.584  | 0.708 | Inf | -0.804     | 1.97       |
| b    | 1.861  | 0.612 | Inf | 0.662      | 3.06       |
| c    | 1.375  | 0.611 | Inf | 0.177      | 2.57       |

Results are given on the log (not the response) scale.

Confidence level used: 0.95

```
> summary(as.glht(pairs(mod.emm)))
```

#### Simultaneous Tests for General Linear Hypotheses

Linear Hypotheses:

|            | Estimate | Std. Error | z value | Pr(> z )   |
|------------|----------|------------|---------|------------|
| a - b == 0 | -1.2769  | 0.4234     | -3.016  | 0.00662 ** |
| a - c == 0 | -0.7905  | 0.4325     | -1.828  | 0.15174    |
| b - c == 0 | 0.4864   | 0.2184     | 2.227   | 0.06210 .  |

---

Signif. codes: 0 '\*\*\*' 0.001 '\*\*' 0.01 '\*' 0.05 '.' 0.1 ' ' 1

(Adjusted p values reported -- single-step method)

```
> multcomp::cld(mod.emm, alpha = 0.05, Letters = LETTERS) ##agrega las letras al poshoc
```

```
year emmean SE df asympt.LCL asympt.UCL .group
```

```
a  0.584 0.708 Inf  -0.804   1.97  A
c  1.375 0.611 Inf   0.177   2.57  AB
b  1.861 0.612 Inf   0.662   3.06  B
```

Results are given on the log (not the response) scale.

Confidence level used: 0.95

P value adjustment: tukey method for comparing a family of 3 estimates

significance level used: alpha = 0.05

>

Response: **Coccinellidae**

```
Chisq Df Pr(>Chisq)
year 19.512 2 5.794e-05 ***
```

---

Signif. codes: 0 '\*\*\*' 0.001 '\*\*' 0.01 '\*' 0.05 '.' 0.1 ' ' 1

```
> mod.emm <- emmeans(m3, ~ year)
```

```
> mod.emm
```

```
year emmean SE df asymp.LCL asymp.UCL
a  0.706 0.354 Inf  0.0118  1.401
b  1.034 0.234 Inf  0.5748  1.494
c  0.160 0.243 Inf -0.3172  0.637
```

Results are given on the log (not the response) scale.

Confidence level used: 0.95

```
> summary(as.glht(pairs(mod.emm)))
```

#### Simultaneous Tests for General Linear Hypotheses

Linear Hypotheses:

```
Estimate Std. Error z value Pr(>|z|)
a - b == 0 -0.3277 0.3348 -0.979 0.581
```

```
a - c == 0  0.5465  0.3483  1.569  0.250
b - c == 0  0.8742  0.1979  4.417  <1e-04 ***
```

---

Signif. codes: 0 '\*\*\*' 0.001 '\*\*' 0.01 '\*' 0.05 '.' 0.1 ' ' 1

(Adjusted p values reported -- single-step method)

```
> multcomp::cld(mod.emm, alpha = 0.05, Letters = LETTERS) ##agrega las letras al poshoc
year emmean SE df asymp.LCL asymp.UCL .group
c  0.160 0.243 Inf -0.3172  0.637  A
a  0.706 0.354 Inf  0.0118  1.401  AB
b  1.034 0.234 Inf  0.5748  1.494  B
```

Results are given on the log (not the response) scale.

Confidence level used: 0.95

P value adjustment: tukey method for comparing a family of 3 estimates

significance level used: alpha = 0.05
